# Supplementary material for: Mitochondrial complexome reveals quality-control pathways of protein import
Source: PubMed Central journal article supplement (PMC9892010; doi:10.1038/s41586-022-05641-w), 2023-01-25
Supplement: 41586_2022_5641_MOESM1_ESM.pdf [file 41586_2022_5641_MOESM1_ESM.pdf]

**Supplementary information**

---

**Mitochondrial complexome reveals quality-control pathways of protein import**

---

In the format provided by the authors and unedited

## **Supplementary Information Guide**

### **Mitochondrial complexome reveals quality control pathways of protein import**

Uwe Schulte et al.

**Supplementary Figure 1. Uncropped versions of gels/blots of this study.**

**Supplementary Table 1. MS data related to identification/quantification of mitochondrial proteins (separate Excel file).** Sheet 1: MitCOM proteins (total of 906 proteins); sheet 2: mitochondrial proteins with single-peptide detection (total of 49 proteins).

**Supplementary Table 2. Data underlying abundance-mass profiles of MitCOM proteins (separate Excel file).**

**Supplementary Table 3. MS data related to identification/quantification of non-mitochondrial proteins (total of 985 proteins) (separate Excel file).**

**Supplementary Table 4. Yeast strains used in this study.**

**Supplementary Table 5. Plasmids used in this study.**

**Supplementary Table 6. Antibodies used in this study.**

**Supplementary Figure 1. Uncropped versions of gels/blots of this study.**

Figure 3b

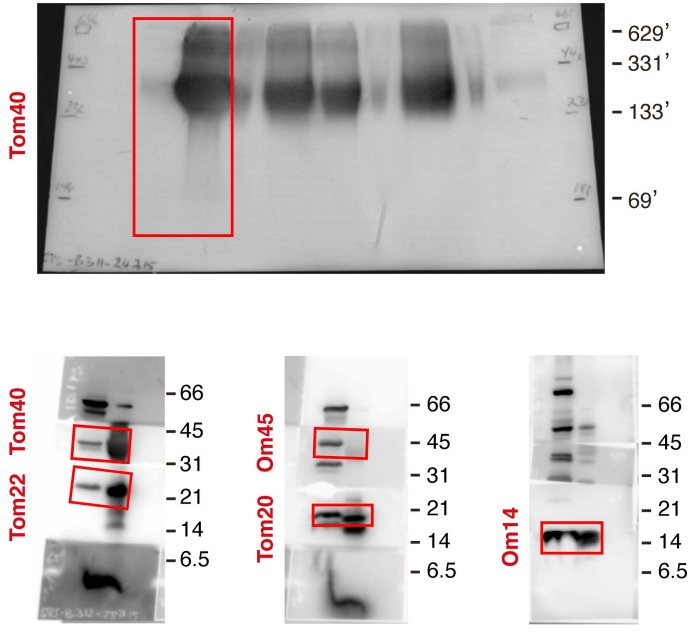

Figure 3e

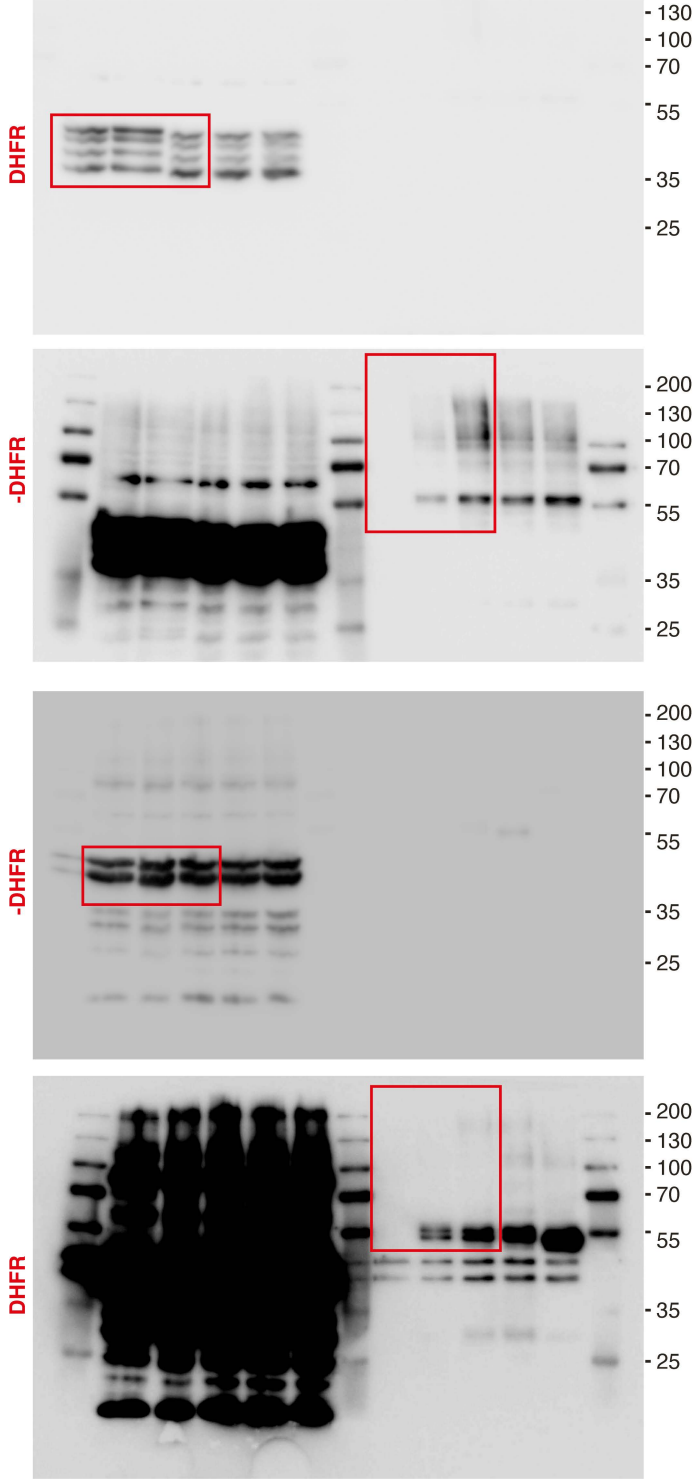

Figure 3d

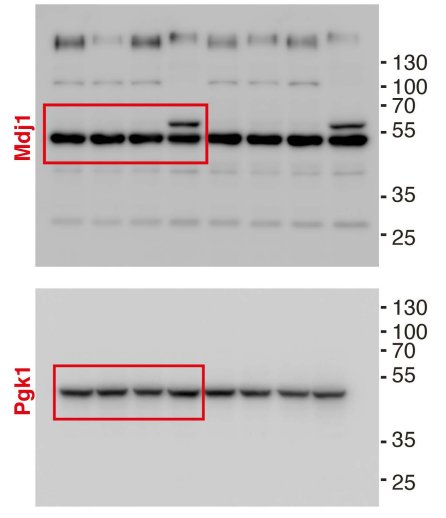

Figure 4b left panel

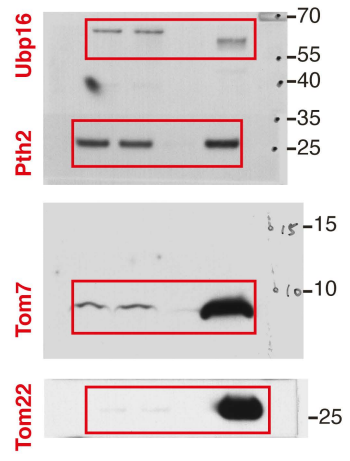

Figure 4b right panel

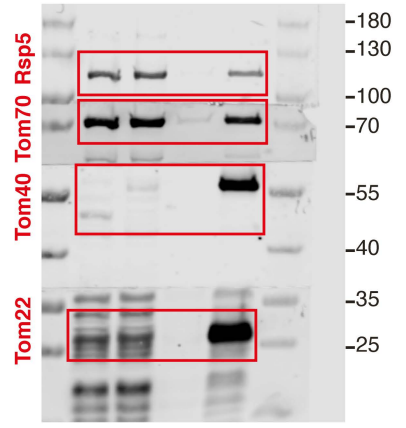

Figure 4c

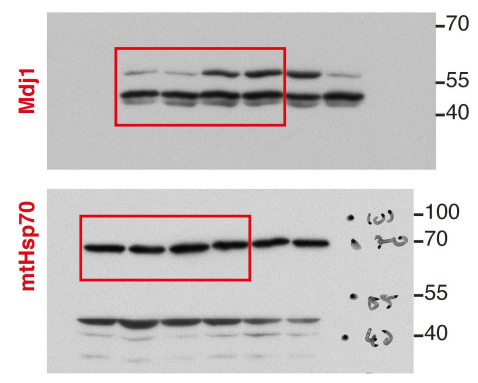

Figure 4d

DHFR

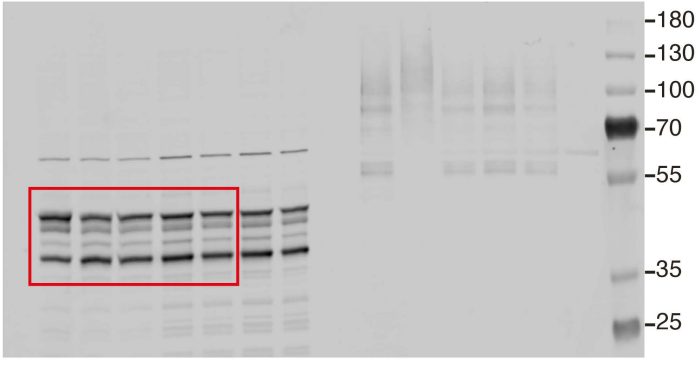

DHFR

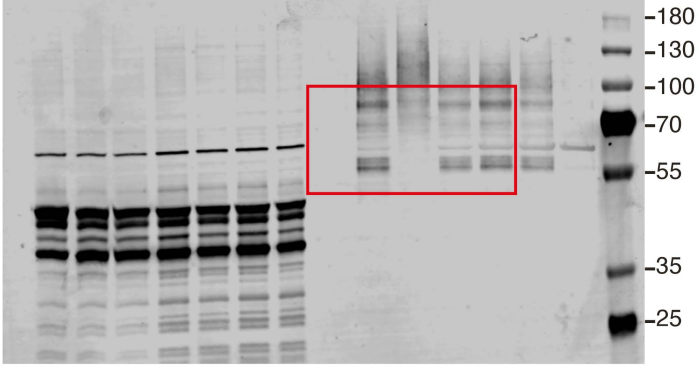

Mdj1

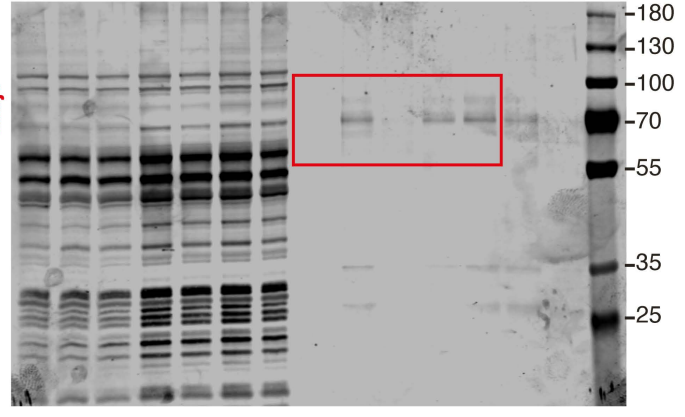

Figure 4e

Mdj1

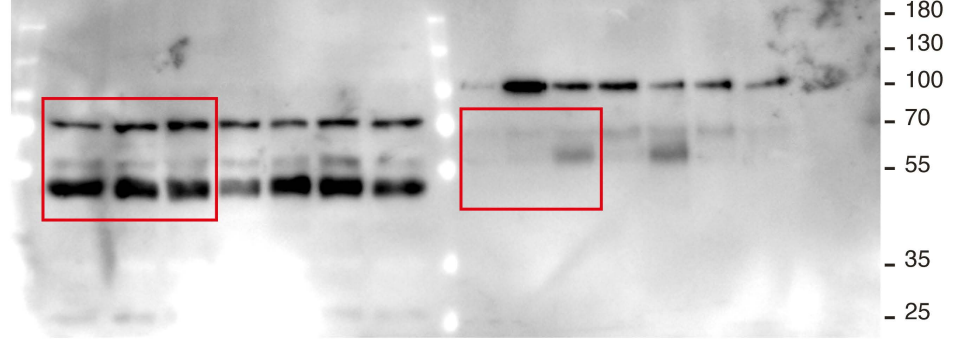

Figure 4f

Mdj1

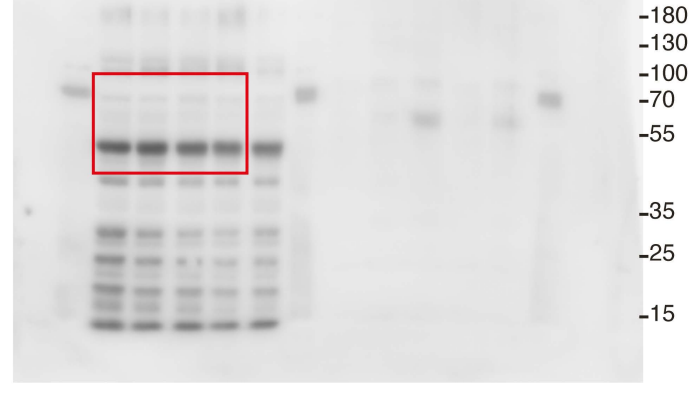

Mdj1

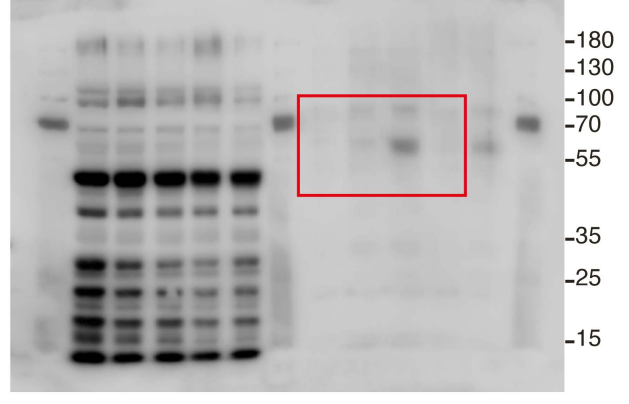

ubiquitin

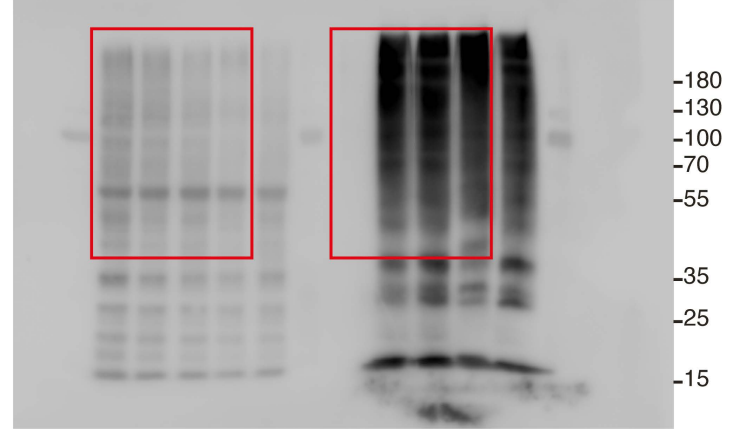

Figure 4g

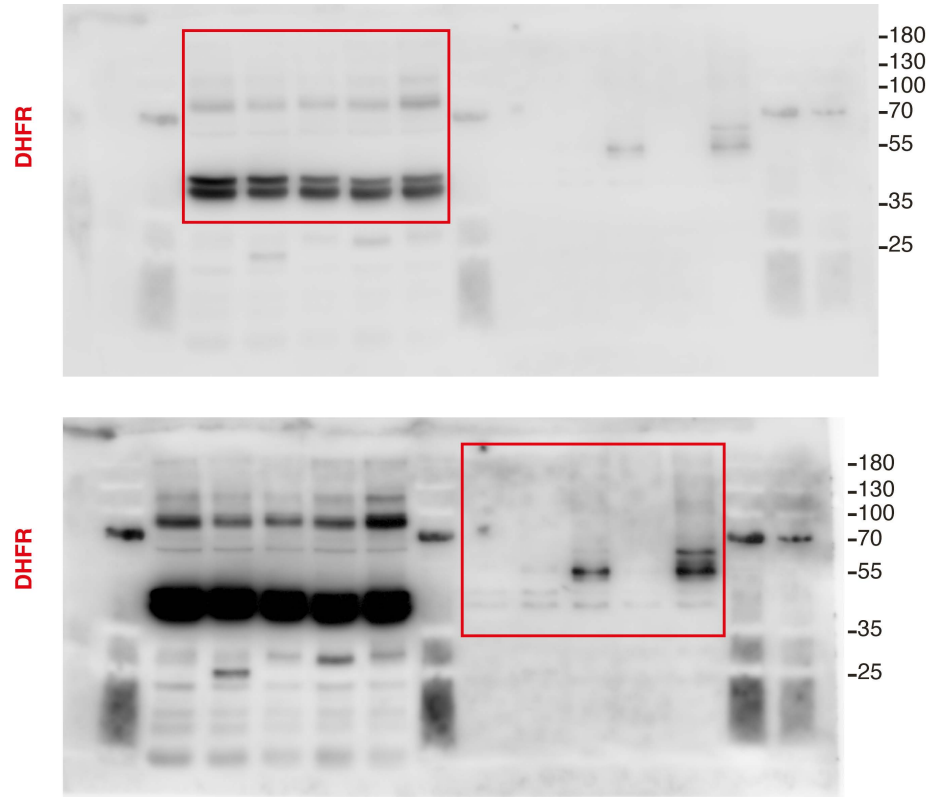

Figure 5c

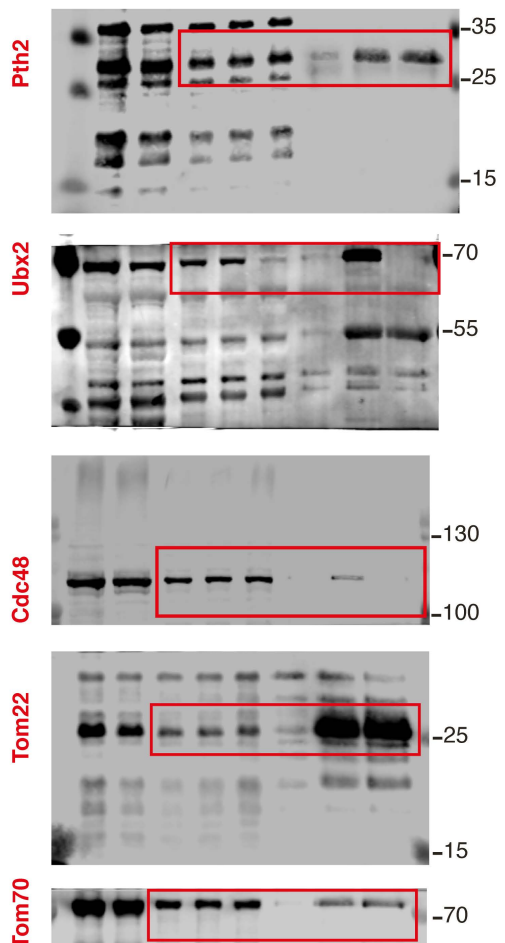

Figure 5g

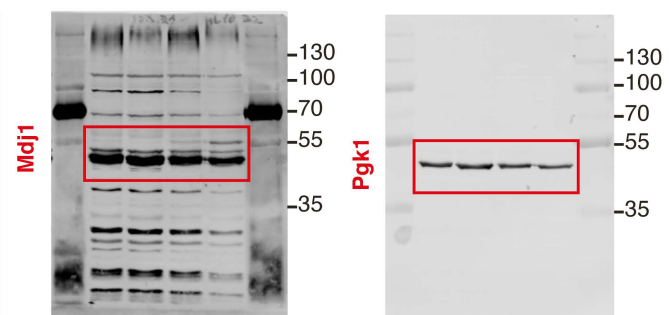

Figure 5a

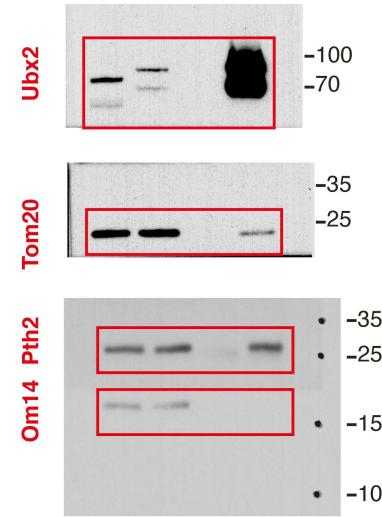

Figure 5b

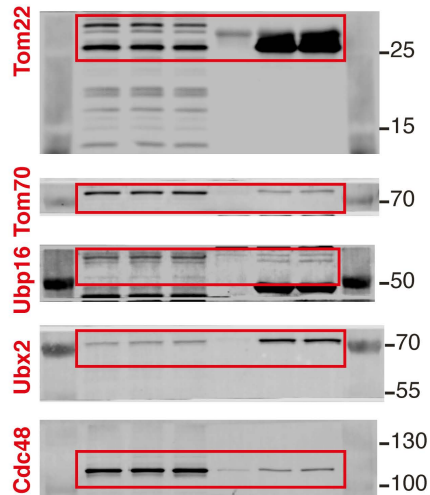

Figure 5e

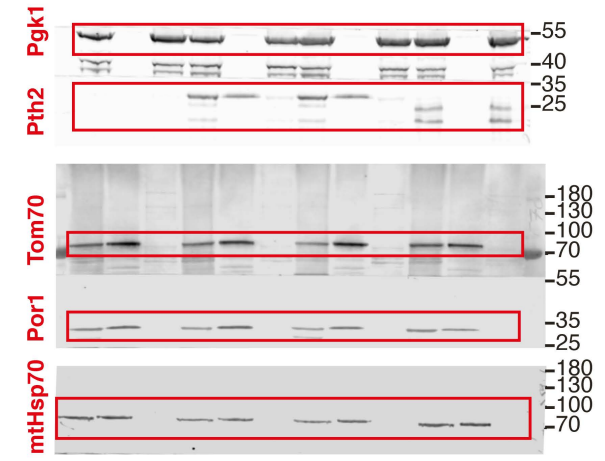

Extended Data Figure 8f

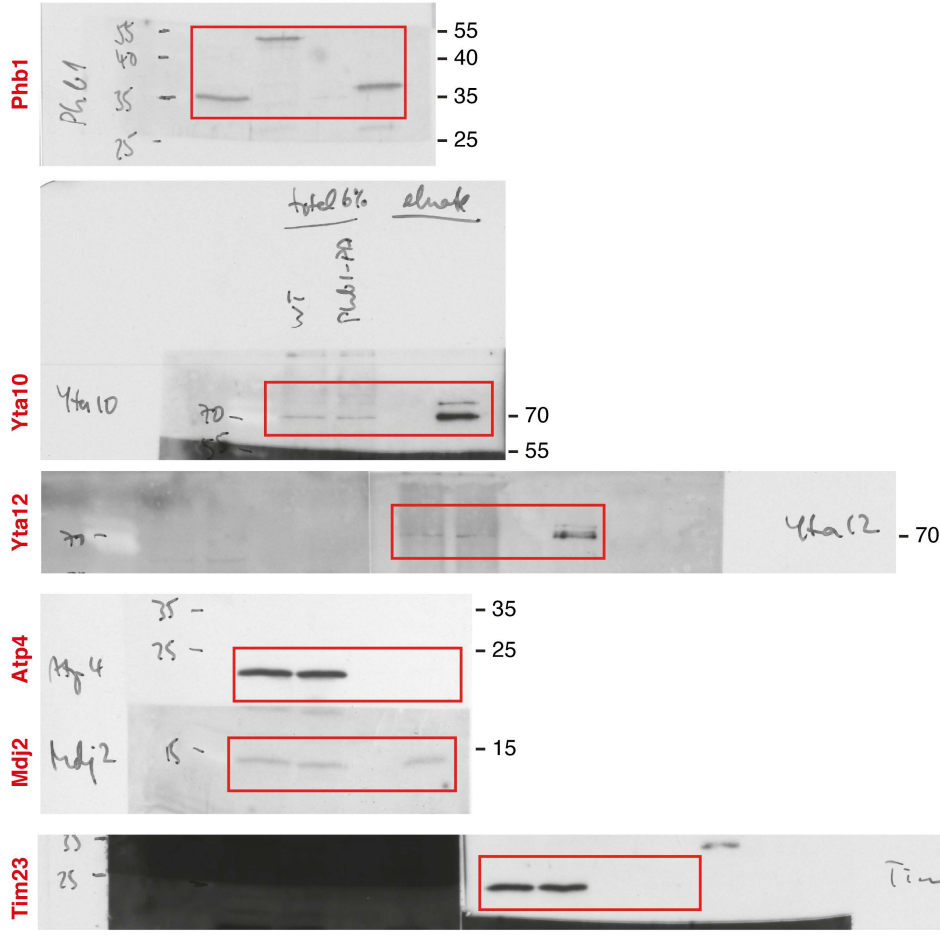

Extended Data Figure 8h

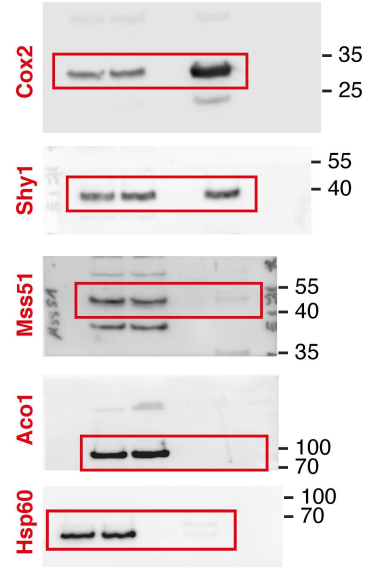

Extended Data Figure 9b

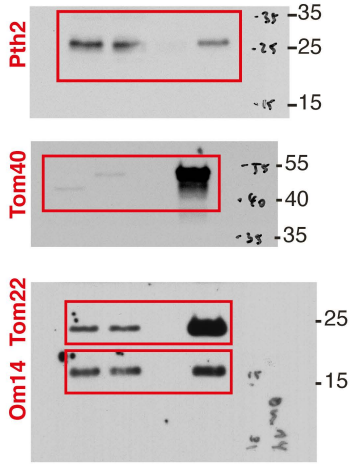

Extended Data Figure 9c

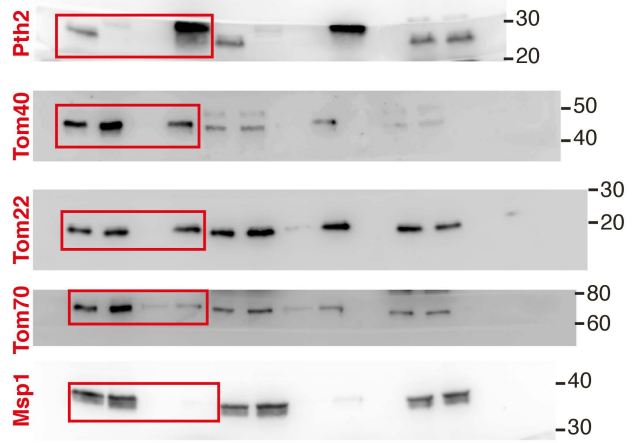

Extended Data Figure 9f

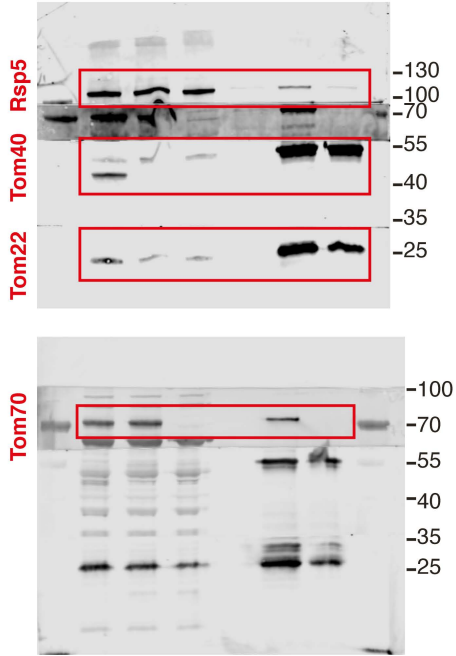

Extended Data Figure 9g

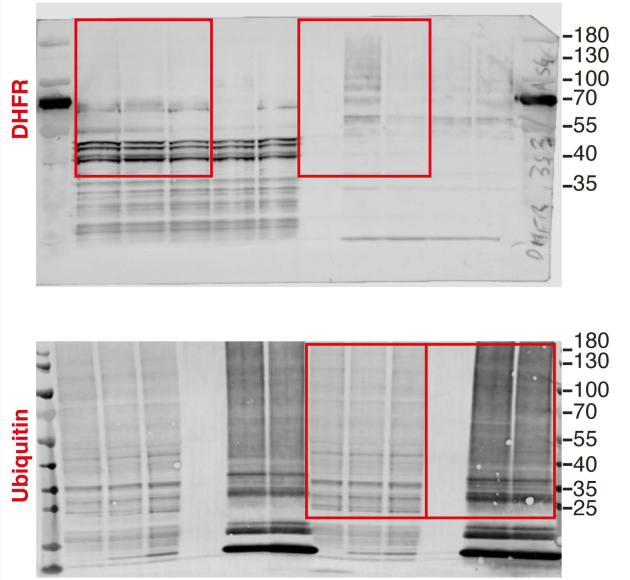

Extended Data Figure 9h

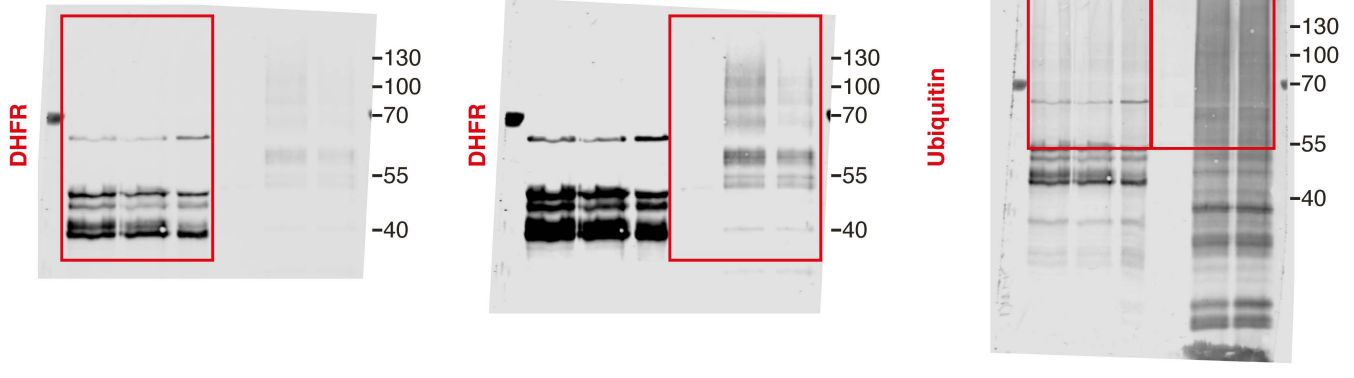

Extended Data Figure 10a

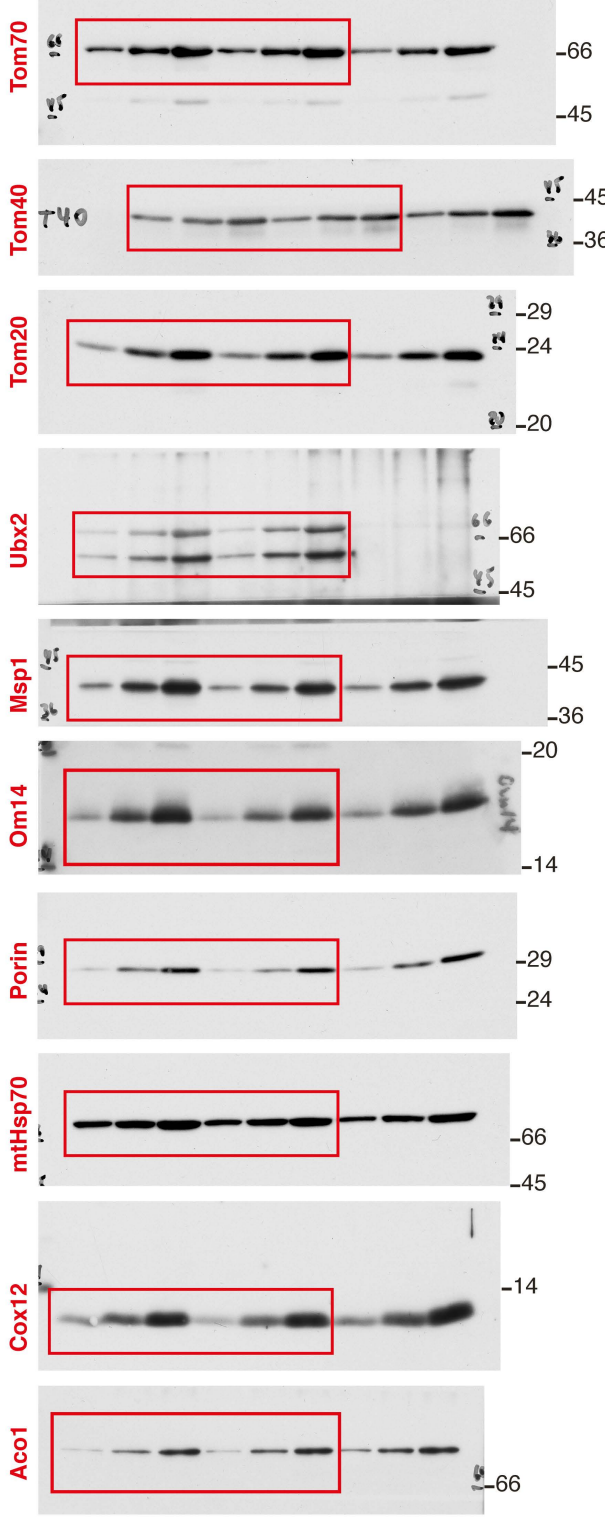

Extended Data Figure 10b

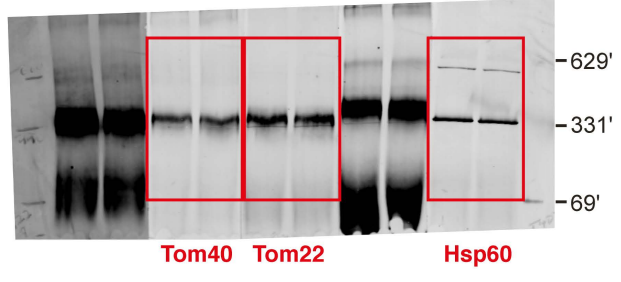

Extended Data Figure 10c

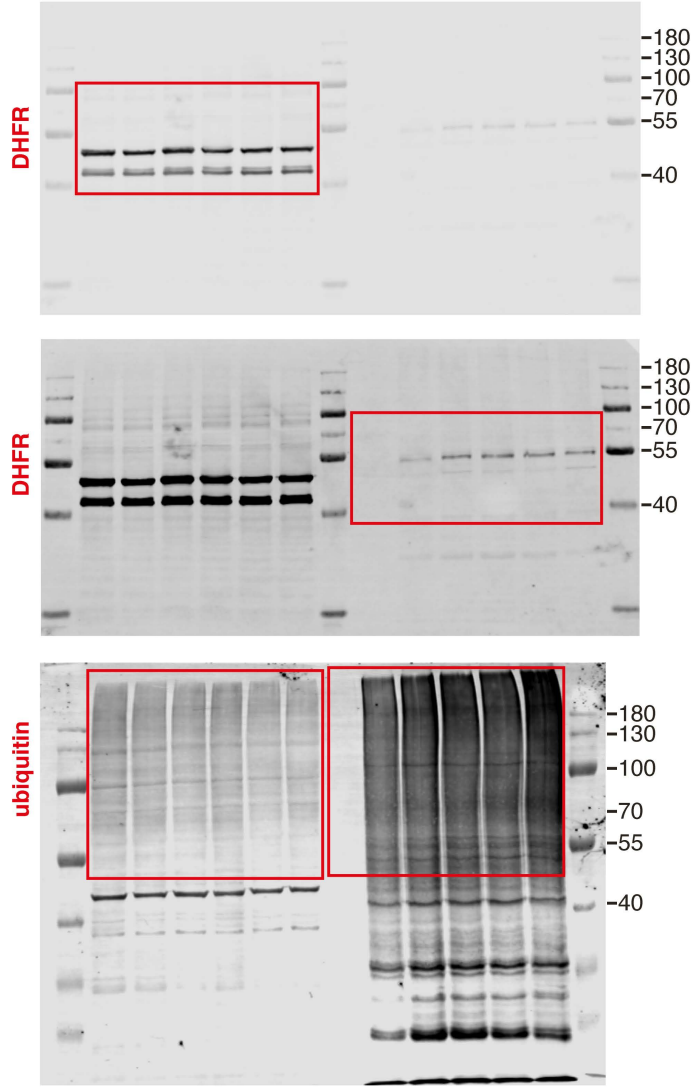



Extended Figure 10e

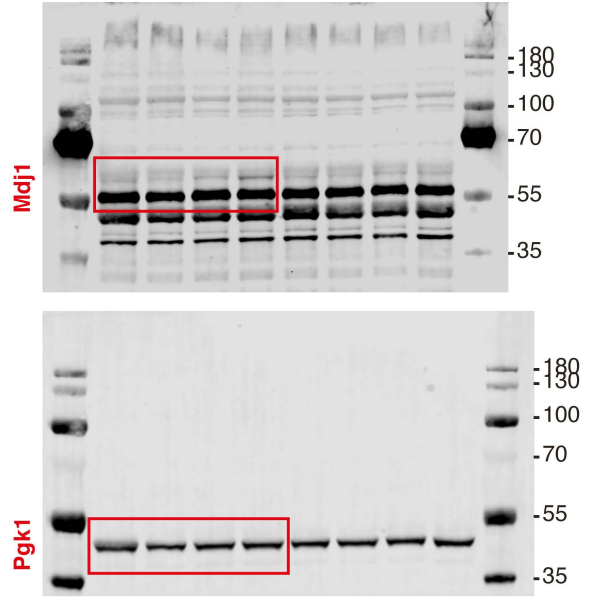

Extended Figure 10g

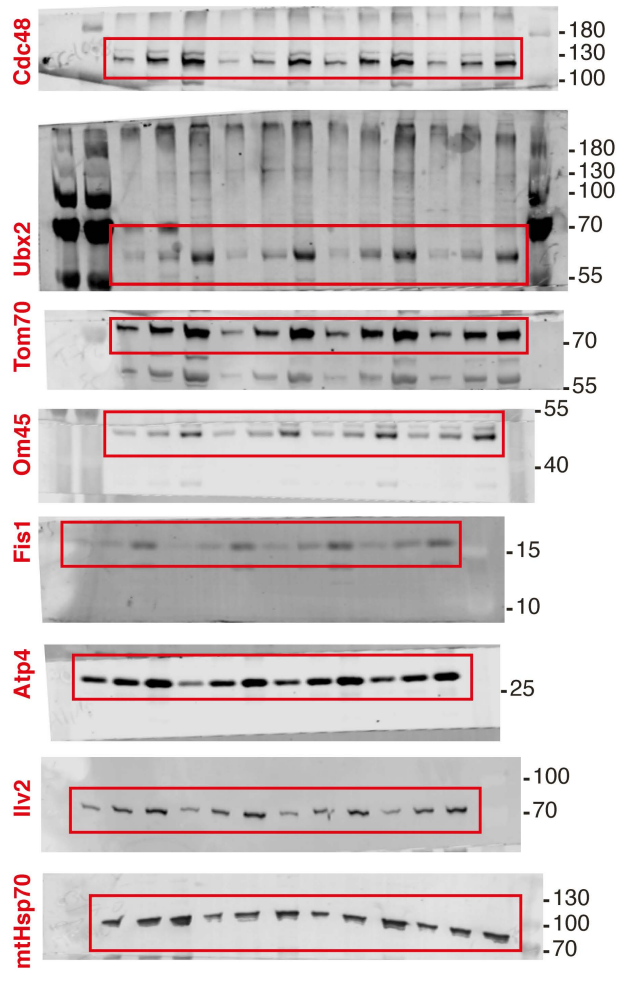

Extended Figure 10f

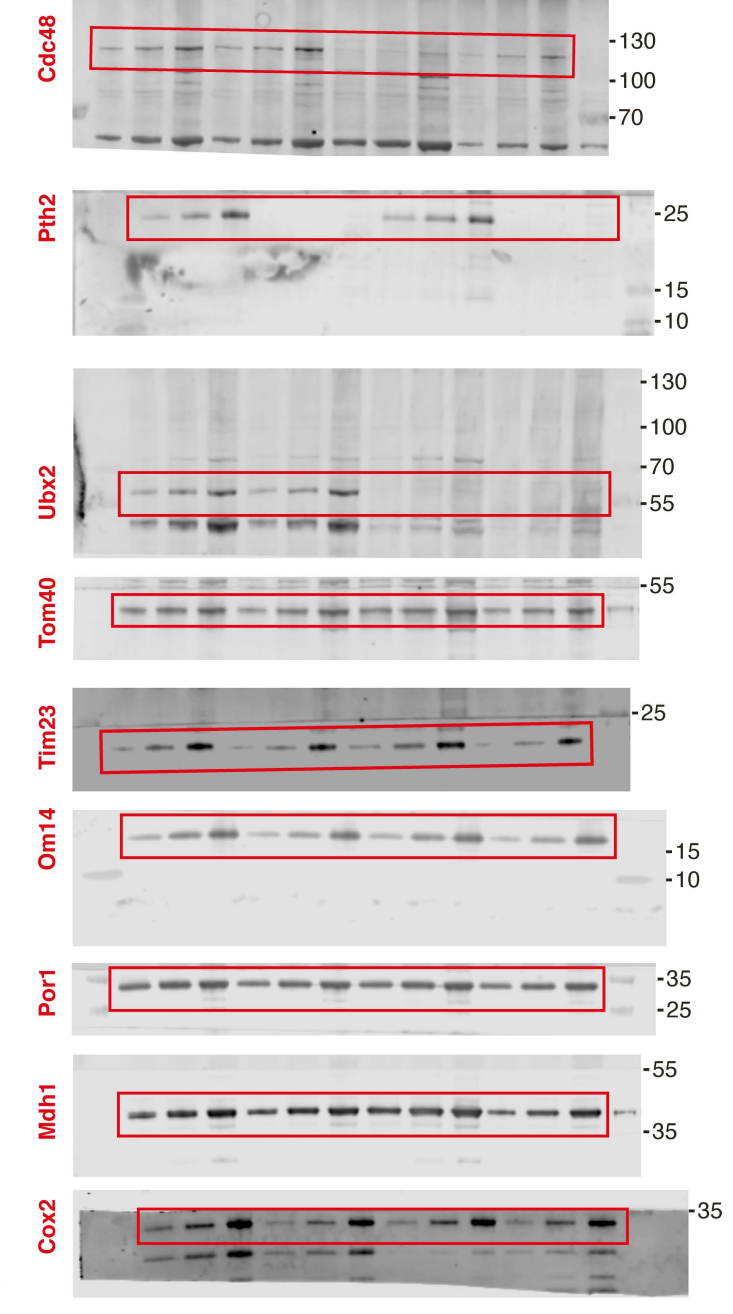

Extended Figure 10h

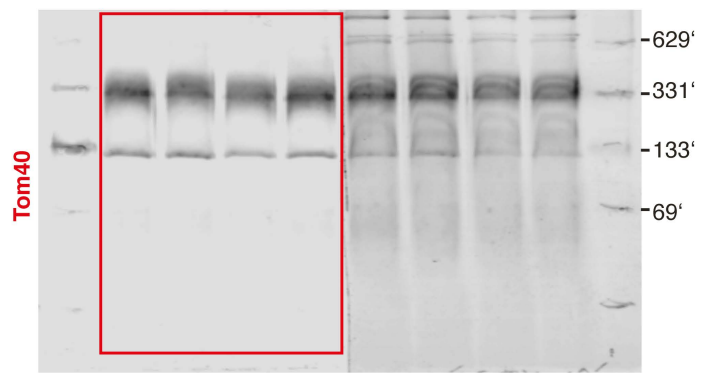

**Supplementary Table 4. Yeast strains used in this study.**

| Genotype                                                                                                                                      | Source     | Identifier |
|-----------------------------------------------------------------------------------------------------------------------------------------------|------------|------------|
| YPH499 (WT) <i>MATa</i> , <i>ura3-52</i> , <i>lys2-801_amber</i> , <i>ade2-101_ochre</i> , <i>trp1-Δ63</i> , <i>his3-Δ200</i> , <i>leu2Δ1</i> | Ref. 43    | TB1        |
| YPH499 <i>cox4::COX4-10His::HIS3MX6</i>                                                                                                       | Ref. 42    | NP3297     |
| YPH499 <i>Phb1<sup>ProtA</sup></i>                                                                                                            | this study | NP4063     |
| YPH499 <i>Tom22<sup>His</sup> Tom40<sup>Strep</sup></i>                                                                                       | this study | NP4420     |
| YPH499 <i>pth2::PTH2-10His::HIS3MX6</i>                                                                                                       | this study | TB3        |
| YPH499 <i>tom20::TOM20-10HIS-HIS3MX6</i>                                                                                                      | Ref. 21    | NP3718     |
| BY4741 (WT) <i>MATa</i> , <i>his3Δ1</i> , <i>leu2Δ0</i> , <i>met15Δ0</i> , <i>ura3Δ0</i>                                                      | EUROSCARF  | TB2        |
| BY4741 <i>tom40::TOM40-3HA-HIS3MX6</i>                                                                                                        | Ref. 17    | TB4        |
| BY4741 <i>pth2::kanMX4</i> , <i>tom40::TOM40-3HA-HIS3MX6</i>                                                                                  | this study | TB5        |
| BY4741 <i>ubx2::kanMX4</i> , <i>tom40::TOM40-3HA-HIS3MX6</i>                                                                                  | Ref. 17    | TB6        |
| BY4741 <i>ubx2::UBX2-3HA::HIS3MX6</i>                                                                                                         | Ref. 17    | TB45       |
| BY4741 <i>pth2::KanMX4</i>                                                                                                                    | EUROSCARF  | TB8        |
| BY4741 <i>pam17::hphNT1</i>                                                                                                                   | Ref. 17    | TB9        |
| BY4741 <i>pth2::KanMX4 pam17Δ::hphNT1</i>                                                                                                     | this study | TB7        |
| BY4741 <i>ubx2::KanMX4</i>                                                                                                                    | EUROSCARF  | TB22       |
| BY4741 <i>ubx2::KanMX4 pth2::HIS3MX6</i>                                                                                                      | this study | TB27       |
| BY4741 <i>ubp16::KanMX4</i>                                                                                                                   | EUROSCARF  | TB21       |
| BY4741 <i>ubp16::KanMX4</i> , <i>pth2::HIS3MX6</i>                                                                                            | this study | TB36       |
| BY4741 <i>pth2::kanMX4 vms1::HIS3MX6</i>                                                                                                      | this study | TB35       |
| BY4741 <i>dsk2::KanMX4</i>                                                                                                                    | this study | TB102      |
| BY4741 <i>dsk2::KanMX4</i> , <i>pam17::hphNT1</i>                                                                                             | this study | TB100      |
| BY4741 <i>rsp5::RSP5-1-KanMX4</i>                                                                                                             | EUROSCARF  | TB20       |
| BY4741 <i>mdm30::KanMX4</i>                                                                                                                   | EUROSCARF  | TB101      |
| BY4741 <i>mfb1::KanMX4</i>                                                                                                                    | EUROSCARF  | TB103      |
| BY4741 <i>rsp4::RSP5-1-KanMX4</i><br><i>ubp16::HIS3MX6</i>                                                                                    | this study | TB39       |
| BY4741 <i>rsp5::RSP5-1-KanMX4</i><br><i>pam17::hphNT1</i>                                                                                     | this study | TB12       |
| BY4741 <i>ubp16::KaMX4 pam17::hphNT1</i>                                                                                                      | this study | TB13       |
| BY4741 <i>pre9::kanMX4 pam17::hphNT1</i>                                                                                                      | Ref. 17    | TB11       |
| BY4741 <i>mdm30::KanMX4 pam17::hphNT1</i>                                                                                                     | this study | TB72       |
| BY4741 <i>mfb1::KanMX4 pam17::hphNT1</i>                                                                                                      | this study | TB73       |
| BY4741 <i>hrd1::KanMX4 pam17::hphNT1</i>                                                                                                      | this study | TB71       |
| BY4741 <i>doa10::KanMX4 pam17::hphNT1</i>                                                                                                     | this study | TB70       |
| BY4741 <i>vms1::KanMX4</i>                                                                                                                    | EUROSCARF  | TB23       |
| BY4741 <i>pth2::KanMX4 pam17Δ::hphNT1</i><br>+ pRS416                                                                                         | this study | TB166      |
| BY4741 <i>pth2::KanMX4 pam17Δ::hphNT1</i><br>+ pRS416 pPTH2 Pth2                                                                              | this study | TB167      |
| BY4741 <i>pth2::KanMX4 pam17Δ::hphNT1</i><br>+ pRS416 pPTH2 Pth2 D174A                                                                        | this study | TB168      |
| BY4741 <i>pth2::KanMX4 pam17Δ::hphNT1</i><br>+ pRS416 pPTH2 Pth2 ΔTM (Δ aa12-32)                                                              | this study | TB169      |
| BY4741 <i>pth2::kanMX4 vms1::HIS3MX6</i> +<br>pRS416                                                                                          | this study | TB171      |
| BY4741 <i>pth2::kanMX4 vms1::HIS3MX6</i> +<br>pRS416 pPTH2 Pth2                                                                               | this study | TB172      |
| BY4741 <i>pth2::kanMX4 vms1::HIS3MX6</i> +<br>pRS416 pPTH2 Pth2 D174A                                                                         | this study | TB173      |
| BY4741 <i>pth2::kanMX4 vms1::HIS3MX6</i> +<br>pRS416 pPTH2 Pth2 ΔTM (Δ aa12-32)                                                               | this study | TB174      |

|                                                       |            |       |
|-------------------------------------------------------|------------|-------|
| BY4741 <i>tom70::hphNT1</i>                           | this study | TB98  |
| BY4741 <i>tom70::hphNT1, tom40::TOM40-3HA-HIS3MX6</i> | this study | TB113 |

**Supplementary Table 5. Plasmids used in this study.**

| <b>Plasmid</b>                                                                                                                          | <b>Source</b>        | <b>Identifier</b> |
|-----------------------------------------------------------------------------------------------------------------------------------------|----------------------|-------------------|
| pDP-CYB2(1-84)-DHFR-HB(81-181)<br>(referred to as <i>b</i> <sub>2</sub> -DHFR)                                                          | Ref. 99              | pTB7              |
| pDP-CYB2(1-84) $\Delta$ (47-65)-DHFR-HB(81-181)<br>(referred to as <i>b</i> <sub>2</sub> $\Delta$ -DHFR)                                | Ref. 99              | pTB8              |
| pDP-CYB2(1-84) $\Delta$ (47-65)-DHFR(L251G, P252G)-HB(81-181)<br>(referred to as <i>b</i> <sub>2</sub> $\Delta$ -DHFR <sup>GGxY</sup> ) | this study           | pTB128            |
| pADH His-Ubiquitin                                                                                                                      | M. Glickman, Ref. 41 | pTB3              |
| pFA6a His3MX6                                                                                                                           | Ref. 46              | pTB2              |
| pFA6a hphNT1                                                                                                                            | Ref. 44              | pTB6              |
| pFA6a KanMX6                                                                                                                            | Ref. 46              | pTB1              |
| pFA6a 3HA-His3MX6                                                                                                                       | Ref. 45              | pTB12             |
| pRS416                                                                                                                                  | Ref. 43              | pTB94             |
| pRS416 pPTH2 Pth2                                                                                                                       | this study           | pTB91             |
| pRS416 pPTH2 Pth2 D174A                                                                                                                 | this study           | pTB92             |
| pRS416 pPTH2 Pth2 $\Delta$ TM ( $\Delta$ aa12-32)                                                                                       | this study           | pTB93             |

**Supplementary Table 6. Antibodies used in this study.**

| <b>Antibody</b>                 | <b>Source</b> | <b>Identifier</b> |
|---------------------------------|---------------|-------------------|
| Rabbit polyclonal anti-Aco1     | Ref. 42       | GR 947            |
| Rabbit polyclonal anti-Atp4     | Ref. 69       | GR 1970           |
| Rabbit polyclonal anti-Cdc48    | Ref. 17       | GR 5015           |
| Rabbit polyclonal anti-Cox2     | Ref. 17       | GR 1948           |
| Rabbit polyclonal anti-Cox12    | Ref. 42       | GR1937            |
| Rabbit polyclonal anti-Cox14    | Ref. 88       | GR 1544           |
| Rabbit polyclonal anti-Fis1     | Ref. 21       | GR 310            |
| Rabbit polyclonal anti-Hsp60    | Ref. 42       | 170               |
| Rabbit polyclonal anti-Ilv2     | Ref. 100      | GR1010            |
| Rabbit polyclonal anti-Mdh1     | Ref. 101      | GR1088            |
| Rabbit polyclonal anti-Mdj1     | Ref. 17       | 121               |
| Rabbit polyclonal anti-Mdj2     | Ref. 42       | GR 1842           |
| Rabbit polyclonal anti-mtHsp70  | Ref. 42       | GR 119            |
| Rabbit polyclonal anti-Msp1     | Ref. 17       | GR 1468           |
| Rabbit polyclonal anti-Mss51    | Ref. 42       | GR 1952           |
| Rabbit polyclonal anti-Om14     | Ref. 17       | GR 3041           |
| Rabbit polyclonal anti-Om45     | Ref. 17       | GR 1311           |
| Rabbit polyclonal anti-Phb1     | Ref. 102      | 298-11            |
| Rabbit polyclonal anti-Por1     | Ref. 21       | GR 3621           |
| Rabbit polyclonal anti-Pth2     | Ref. 21       | GR 797            |
| Rabbit polyclonal anti-Rsp5     | this study    | GR 5064           |
| Rabbit polyclonal anti-Shy1     | Ref. 42       | GR 1094           |
| Rabbit polyclonal anti-Tim23    | Ref. 17       | GR 133            |
| Rabbit polyclonal anti-Tom7     | Ref. 80       | GR 230            |
| Rabbit polyclonal anti-Tom20    | Ref. 69       | GR 3225           |
| Rabbit polyclonal anti-Tom22    | Ref. 69       | GR 3227           |
| Rabbit polyclonal anti-Tom40    | Ref. 69       | 168               |
| Rabbit polyclonal anti-Tom70    | Ref. 69       | GR 657            |
| Rabbit polyclonal anti-Ubp16    | Ref. 21       | GR 5040           |
| Rabbit polyclonal anti-Ubx2     | Ref. 17       | GR1484            |
| Rabbit polyclonal anti-Yta10    | Ref. 6        | GR1550-3          |
| Rabbit polyclonal anti-Yta12    | this study    | GR1437-3          |
| Rabbit polyclonal anti-Pgk1     | Ref. 17       | GR 753            |
| mouse-monoclonal anti-DHFR      | Santa Cruz    | sc-377091         |
| mouse-monoclonal anti-Pgk1      | Invitrogen    | 459250            |
| mouse-monoclonal anti-ubiquitin | Santa Cruz    | sc-8017           |
